# Supplementary material for: Direct and indirect parental exposure to endocrine disruptors and elevated temperature influences gene expression across generations in a euryhaline model fish
Source: PeerJ. 2019 Jan 8;7:e6156. doi: 10.7717/peerj.6156 (PMC6329337; doi:10.7717/peerj.6156)
Supplement: Data S1 — Fold change (log2) values are provided for each data set in this study. Please refer to the description tab for more information on calculations used to normalize CT values and convert to fold-change values [file peerj-07-6156-s008.xlsx]

## Sheet: Pgen ovaries
Treatment	Temp	Rep	Sample	Sex	Plate	HSD17	HSD3	Arx	CYP19a	ESR1	ESR2	ESR3	FSHR	HSP90	INHA
Bif	Cold	1	3	F	1	-124.097	-15.7016	-61.5474	-353.757	-53.8085	-90.0115	-76.8979	-20.0728	-4.01651	-2.84434
Bif	Cold	1	5	F	13	-36.8999	-0.184416	-2.81701	-11.1912		-3.69395	-2.8396	-1.65967	-3.47027	-1.95806
Bif	Cold	2	1	F	11	-0.15232	-10.2696	-1.8933	-8.02935	-3.54887	-0.702473	-4.97895	-0.567224	-2.50478	-21.4502
Bif	Cold	3	2	F	6	-0.0136656	-10.8978	-8.13679	-8.3794	-1.10538	-1.34431	-0.643302	-1.87894	-0.363199	-1.72895
Bif	Cold	3	5	F	9	-0.0948343	-0.0682737	-0.711803	-1.24428	-1.20516	-0.559021	-0.552718	-0.131585	-0.376178	-0.812267
Bif	Cold	4	1	F	4	-4.71458	-6.21493	-3.5924	-4.94864	-0.667557	-1.0592	-1.58736	-2.3248	-0.543216	-0.834601
Bif	Cold	4	4	F	6	-10.0786	-4.41559	-3.69823	-11.8364	-1.05759	-3.48386	-1.26518	-4.46066	-0.509274	-1.21506
Bif	Cold	5	1	F	1	-20.3406	-8.17936	-6.01154		-3.04177	-10.3452	-9.49534	-2.26287	-2.90514	-1.04981
Bif	Cold	5	2	F	13	-16.3005	-1.29317	-0.328637	-5.82497	-0.503906	-0.922367	-0.446726	-0.235111	-0.537121	-1.5989
Bif	Cold	5	3	F	15	-0.241239	-1.30351	-0.177471	-0.102102	-0.134018	-0.0709499	-0.0768366	-0.195633	-0.487657	-0.300274
Bif	Hot	1	1	F	3	-8.15158	-2.32715	-0.222543	-0.394304	-1.03887	-0.115996	-0.694849	-0.711845	-0.590805	-0.752202
Bif	Hot	1	4	F	11	-0.982447	-39.5707	-7.78729	-23.9297	-3.91727	-2.06094	-27.2312	-3.075	-10.5501	-118.055
Bif	Hot	1	5	F	7	-0.529203	-0.38827	-1.93949	-0.0267236	-0.433856	-4.38048	-2.667	-0.166236	-2.33541	-1.02386
Bif	Hot	2	1	F	15	-0.0215467	-0.0300765	-1.22553	-0.101537	-0.386531	-0.59707	-0.104753	-0.825995	-1.3021	-0.21766
Bif	Hot	2	3	F	14	-0.0259572	-0.16487	-0.00490204	-0.312936		-2.03102	-0.597597	-0.000196992	-0.565567	-0.519073
Bif	Hot	3	1	F	15	-0.0125111	-3.90989	-17.6575	-0.63358	-1.63966	-40.5958	-0.589441	-3.03472	-4.83481	-2.85156
Bif	Hot	3	2	F	16	-7.33663	-1.39231	-0.388101	-1.31472	-0.000101088	-0.433186	-0.361829	-0.257866	-0.424933	-0.228844
Bif	Hot	4	4	F	4	-4.70336	-2.00073	-0.4915	-2.41556		-0.397444	-1.29479	-1.72663	-0.132576	-0.157068
Bif	Hot	4	6	F	2	-1.21061	-1.02665	-0.131504	-0.264946	-0.509294	-0.123104	-0.0564688	-0.515285	-1.61138	-0.383723
Bif	Hot	5	4	F	10	-3.99606	-0.385429	-0.465432	-0.261133	-0.759396	-0.565383	-0.166795	-0.0266884	-0.423366	-0.450331
Bif	Hot	5	5	F	15	-0.00112305	-0.0060877	-0.00530999	-4.68e-05		-0.00479115	-0.00389124	-0.00539823	-0.00357314	-0.00286622
EE2	Cold	1	3	F	15	-0.266323	-0.607643	-2.036	-0.0137621	-1.0054	-5.25684	-1.26045	-1.43048	-1.52611	-1.97629
EE2	Cold	1	4	F	5	-0.316947	-1.43592	-0.719917	-2.45416		-0.601481	-0.393217	-0.321243	-0.211556	-0.291859
EE2	Cold	2	3	F	8	-0.755487	-3.498	-4.41057	-7.13874	-0.505231	-2.78512	-0.648751	-2.00289	-0.366143	-1.49932
EE2	Cold	2	4	F	8	-4.66535	-0.00840126	-0.288408		-0.29246	-2.20601	-1.0786	-113.404	-0.141411	-0.00307837
EE2	Cold	3	1	F	14	-7.94954	-1.53612	-0.422408	-0.563192	-0.284122	-1.01698	-0.230057	-0.134492	-0.715235	-1.00287
EE2	Cold	3	2	F	4	-5.86716	-3.35551	-0.816559	-10.1197	-0.0750286	-0.575059	-0.607392		-0.352658	-0.235061
EE2	Cold	4	2	F	13	-19.9164	-5.12765	-1.69262	-5.40436	-2.01845	-1.16628	-2.14897	-2.93403	-1.06233	-1.97998
EE2	Cold	5	6	F	10	-0.0370066	-0.113207	-1.96854	-0.0104284	-1.07043	-1.61381	-1.20549	-0.0579782	-1.23768	-0.314946
EE2	Hot	1	1	F	16			-1.59369	-0.00207476		-0.0871183	-0.031252	-0.323184	-0.987599
EE2	Hot	1	6	F	9	-0.0887125	-0.0262336	-0.0875359	-0.297417	-0.565234	-0.253539	-0.146332	-0.0430367	-0.131806	-0.117605
EE2	Hot	2	1	F	1	-90.4812	-60.4428	-22.2279	-6.75739	-25.0166	-63.3616	-53.0667	-49.0415	-6.47501	-1.66505
EE2	Hot	2	3	F	5	-23.7221	-1.67588	-0.303155	-0.82891	-0.031937	-0.303217	-0.869862	-0.603892	-0.329033	-0.474307
EE2	Hot	3	5	F	10	-0.0133036	-0.0588741	-0.639055	-0.0427034	-0.186267	-0.750061	-0.219826	-0.00986355	-0.459552	-0.336993
EE2	Hot	3	6	F	16	-0.133948	-6.37259	-3.74395	-5.37634	-0.342357	-3.12371	-1.09364	-3.70703		-2.31708
EE2	Hot	4	3	F	3	-2.33921	-0.634889	-0.104457	-0.235566	-0.53959	-0.139549	-0.360189	-0.474356	-0.201185	-0.533755
EE2	Hot	5	1	F	11	-16.3005	-1.29317	-0.328637	-5.82497	-0.503906	-0.922367	-0.446726	-0.235111	-0.537121	-1.5989
EE2	Hot	5	3	F	16	-17.5159	-4.21857	-1.77366	-2.30825	-0.373555	-3.10831	-0.924181	-2.49854	-0.679644	-1.10969
MeOH	Cold	1	5	F	16	-0.864023	-0.0170675	-0.00665225	-0.0940908	-0.00193174	-0.853144	-0.771838	-2.56e-05	-0.0605483	-0.101106
MeOH	Cold	1	6	F	4	-0.222408	-1.02813	-0.453941	-3.63565	-0.0305012	-0.169673	-0.276001	-0.458675	-0.135792	-0.185094
MeOH	Cold	2	5	F	1	-89.9126	-22.0039	-16.0076	-45.123	-4.69295	-4.78677	-21.438	-13.0517	-4.90738	-1.01155
MeOH	Cold	3	2	F	7		-0.00260356	-0.00260145	-0.00514997	-0.00402706	-0.00235873	-0.0183656	-0.000102489	-3.59e-05	-0.000413946
MeOH	Cold	3	4	F	3	-0.0815362	-1.7397	-1.14077		-1.27197	-1.10866	-3.00487	-1.84976	-2.71613	-5.84474
MeOH	Cold	4	4	F	2	-11.6465	-10.1233	-2.89917	-1.86484	-10.9861	-14.339	-10.4424	-6.68701	-1.70159	-1.39129
MeOH	Cold	5	4	F	5		-0.0397461	-0.00257991	-0.0500674	-0.00456341	-0.00270535	-0.00507262	-0.00552621	-0.000121789	-0.0010978
MeOH	Hot	1	1	F	11	-19.9164	-5.12765	-1.69262	-5.40436	-2.01845	-1.16628	-2.14897	-2.93403	-1.06233	-1.97998
MeOH	Hot	1	3	F	10	-4.89153	-0.526515	-0.889821	-0.140685	-2.19966	-1.1284	-0.306016		-0.375129	-0.458097
MeOH	Hot	2	1	F	4	-0.020321	-1.24152	-0.406761	-0.757183	-0.155228	-0.184061	-0.468584	-0.498126	-0.104581	-0.196839
MeOH	Hot	2	6	F	16	-0.013872	-2.94485	-0.623505	-5.99999		-2.29469	-1.98809	-2.53804	-0.833099	-0.562333
MeOH	Hot	3	5	F	9	-0.958699	-0.115432	-0.309651	-0.170977	-1.7288	-0.490709	-0.218203	-0.263482	-0.270181	-0.296454
MeOH	Hot	4	5	F	2	-18.2286	-1.94887	-0.939647	-0.244741	-2.62112	-0.499184	-1.0434	-1.48908	-1.58822	-0.794339
MeOH	Hot	5	2	F	18	-42.3511	-2.87046	-9.60708	-10.1083	-6.36145	-6.87449	-3.54771	-6.60299	-1.20294	-7.22627

## Sheet: Pgen testes
Treatment	Temp	Rep	Sample	Sex	Plate	HSD17	HSD3	Arx	CYP19a	ESR1	ESR2	ESR3	FSHR	HSP90	INHA
Bif	Cold	1	4	M	1	-0.680559	-0.496646	-2.50694	-0.398912	-0.0840288	-2.56504	-11.2616	-0.771356		-0.0434517
Bif	Cold	2	2	M		-2.52572	-3.56971	-2.18689	-4.50063	-3.0744	-2.30312	-2.69106	-1.40669	-0.302921	-5.26996
Bif	Cold	2	3	M	11	-0.02966	-0.0859269	-0.922466	-0.00262291	-0.000198315	-0.0240902	-0.0770609	-0.490766	-1.16066	-0.586542
Bif	Cold	3	6	M	8	-0.260977	-13.145	-4.0502	-9.00555	-0.48835	-4.20194	-5.40225	-3.07085	-1.03089	-22.1286
Bif	Cold	4	3	M	7	-2.73303	-5.18982	-0.0993733	-1.59557	-0.148984	-0.0408891	-0.36035	-0.0652498		-0.0178166
Bif	Cold	5	5	M	13	-0.0760233	-0.652297	-1.07663	-0.057266	-0.83695	-0.947909	-1.45067	-0.97848	-4.61394	-1.2934
Bif	Hot	1	2	M	18	-0.109547	-2.29455	-1.26561	-3.31789	-0.558657	-1.37842	-2.5216	-0.361568	-0.533985	-4.11764
Bif	Hot	2	5	M	3	-0.111022	-0.265325	-0.144627	-0.00120109	-0.162072	-0.239745	-0.797108	-0.425813	-0.258977	-0.0765167
Bif	Hot	2	6	M	9	-0.00309927	-0.116899	-0.866576	-0.588085	-0.625391	-1.30873	-1.69926	-0.0510494	-0.355749	-2.02585
Bif	Hot	3	4	M	6	-1.7265	-33.1218	-30.7854	-1.23419	-0.717896	-35.9272	-1.73658	-5.38717	-5.21361	-3.07491
Bif	Hot	3	5	M	5	-0.0692108	-0.616489	-0.370554	-0.24033	-0.0681985	-0.551384		-0.621802	-0.0776645	-1.53115
Bif	Hot	4	2	M	15	-1.75823	-65.1844	-19.2858	-54.123	-11.2911	-29.5453	-15.3636	-2.73551	-1.1029	-226.749
Bif	Hot	5	6	M	4	-0.0760233	-0.652297	-1.07663	-0.057266	-0.83695	-0.947909	-1.45067	-0.97848	-4.61394	-1.2934
EE2	Cold	1	2	M	2	-0.0380475	-0.0443019	-1.09072	-0.00378888	-0.0166584	-0.641992	-0.380545	-0.35181	-3.583	-0.295891
EE2	Cold	1	6	M	9	-0.00166315	-0.0472765	-0.284145	-0.197098	-0.179089	-0.456987	-1.45723	-0.0704902	-0.389054	-1.22144
EE2	Cold	2	2	M	10	-0.0660322	-0.360028	-5.2824	-0.171443	-0.462083	-1.9856	-0.973072	-0.0168345		-0.988681
EE2	Cold	2	5	M	11	-35.7072	-16.1191	-7.38661	-9.00106	-3.90629	-10.7186	-4.01742	-3.23046	-1.78335	-6.21241
EE2	Cold	3	3	M	10	-0.0353843	-0.0148195	-0.265812	-0.00141909	-0.0655424	-0.103287	-0.0789361	-0.0816948	-0.87561	-0.151384
EE2	Cold	3	5	M	2	-0.0347516	-0.0396212	-0.168969		-0.892922	-0.196965	-0.169386	-0.00250771	-0.588655	-0.0593664
EE2	Cold	4	3	M	3	-0.00758773	-0.444033	-0.149038	-0.051684	-0.156551	-0.131232	-0.954483	-0.52398	-0.230758	-0.955077
EE2	Cold	4	5	M	8	-0.180607	-7.31332	-32.2358	-9.26183	-0.493851	-10.7475	-10.555	-8.97003	-22.5526	-23.8134
EE2	Cold	5	3	M	8		-0.00414786	-0.025244	-0.00389203	-0.000911321	-0.0178321	-0.00542375	-0.0056272	-0.0142875	-0.00718635
EE2	Cold	5	5	M	6	-0.332285	-2.75307	-2.63854	-0.651244	-0.778581	-0.539685	-0.215037	-0.697892	-0.310396	-4.42593
EE2	Hot	1	2	M	2	-0.165917	-2.04221	-0.183085	-0.0332485	-0.899214	-0.165057	-1.82521	-0.198811	-0.782032	-4.28
EE2	Hot	1	4	M	14	-0.0165604	-0.789015	-0.230007	-1.9215	-0.440478	-1.038	-0.251542	-0.250153	-0.207826	-0.507382
EE2	Hot	2	5	M	18	-0.0263951	-0.0407845	-0.281001	-0.0369527	-0.0940736	-0.325682	-0.113874	-0.0923069	-0.462688	-0.364858
EE2	Hot	3	1	M	13	-0.982447	-39.5707	-7.78729	-23.9297	-3.91727	-2.06094	-27.2312	-3.075	-10.5501	-118.055
EE2	Hot	4	6	M		-4.20135	-0.493016	-0.494719	-0.981694	-0.230154	-0.724738	-0.70937	-0.290355	-0.843979	-2.18874
EE2	Hot	4	2	M	18	-0.0169146	-2.23965	-1.13682	-1.83288	-2.64414	-0.159362	-0.249384		-0.665255	-6.89473
EE2	Hot	5		M		-4.20135	-0.493016	-0.494719	-0.981694	-0.230154	-0.724738	-0.70937	-0.290355	-0.843979	-2.18874
EE2	Hot	5	2	M	6	-0.0348345	-3.50502	-3.31358	-5.3456	-0.36373	-4.29779	-0.538159	-1.78427	-2.57097	-8.41763
MeOH	Cold	1	2	M	7	-0.162187	-2.02084	-0.969689	-1.28136	-0.0287092	-2.94659	-0.0373608	-0.159827	-0.180411	-1.29301
MeOH	Cold	1	3	M	7	-6.32031	-10.697	-6.43501	-2.89232	-1.01592	-5.46735	-3.00606	-0.652994	-1.45826	-3.17351
MeOH	Cold	1	4	M	8	-0.373837	-2.80585	-3.78928	-4.54098	-0.000169227	-1.22454	-0.378962	-0.893857	-0.347929	-0.468049
MeOH	Cold	2	1	M	8	-0.0467927	-0.19995	-0.934497	-0.0353603	-0.0577163	-1.37627	-0.28597	-0.529529	-0.625952	-0.135448
MeOH	Cold	2	6	M	6	-0.501202	-0.085517	-0.178863	-0.101794	-0.0295772	-0.41703	-0.0974574	-0.602622	-0.133255	-0.543203
MeOH	Cold	3	1	M	5	-1.99132	-2.04998	-0.701256	-0.969596	-0.129023	-0.82289	-0.609756	-0.401523	-0.109981	-0.601897
MeOH	Cold	3	3	M	14	-0.244927	-0.530928	-0.852284	-0.419485	-0.199894	-1.38744	-0.434255	-0.14787	-0.988608	-1.29676
MeOH	Cold	4	6	M	5	-0.0332504	-0.106833	-0.407062	-0.00720213	-0.0264443	-0.0383768	-0.518747	-0.0894618	-0.0901276	-0.0308413
MeOH	Cold	5	1	M	13	-28.1054	-12.6875	-5.81406	-7.0848	-3.07467	-8.43667	-3.16214	-2.54272	-0.767731	-3.09439
MeOH	Cold	5	2	M	3	-0.148112	-0.2139	-0.602437	-0.00111619	-0.504552	-0.569732	-1.37419	-0.944404	-0.964989	-0.0853174
MeOH	Cold	5	3	M	7	-0.381717	-0.93084	-23.0122	-0.154868	-4.36228	-21.8953	-9.48918		-5.09988	-4.8227
MeOH	Hot	1	5	M	16	-0.0797412	-0.316075	-0.581909	-1.44679	-0.749786	-1.07921	-0.877262	-0.296118	-0.650444	-0.812698
MeOH	Hot	2	3	M	10	-0.0174014	-0.133672	-1.08281	-0.0726314	-0.376543	-1.78048	-0.963777		-0.810004	-0.310732
MeOH	Hot	2	5	M	13	-0.674505	-1.95408	-20.978	-0.0596483	-0.00450993	-0.547842	-1.75246	-11.1606	-26.3949	-13.3387
MeOH	Hot	3	1	M	7	-0.137203	-1.07413	-2.78742	-0.062822	-0.166346	-0.111908	-0.0347429	-0.318411	-0.337434	-0.574245
MeOH	Hot	3	3	M	9	-0.011906	-0.00339768	-0.229188	-0.00760189	-0.198554	-0.666341	-1.37284	-0.120689	-0.210843	-0.141026
MeOH	Hot	4	1	M	9	-0.000898841	-0.0128393	-1.7494	-0.0204199	-0.799115	-1.92699	-4.36751	-0.152436	-1.49135	-0.66817
MeOH	Hot	5	5	M	14	-0.000702341	-1.08554	-0.71294	-16.2173	-0.458464	-2.71402	-0.2484	-0.707867	-1.04828	-4.9204
MeOH	Hot	5	6	M	14	-0.147179	-0.209708	-2.70077	-0.160856	-0.383364	-5.28416	-2.14065	-0.257479	-0.875565	-3.0903

## Sheet: F1 larvae 
Treatment	Temp	Rep	Fish	Plate	HSD17	HSD3	CYP19b	ESR1	ESR2	ESR3	FSHR	GnRHR	GPR30	IGF2
MeOH	cold	1	1	5	-0.262402	-0.370042	0.693976	-0.477131	0.25951	-0.707327	0.172388	-0.948791	-0.42598	-0.430894
MeOH	cold	1	2	7	1.03402	0.59447	-0.766377	0.339	0.650195	0.645453	1.25042	1.54127	0.7018	0.778083
MeOH	cold	2	4	9	0.312899	-0.18894	-1.93595	0	-0.303151	-0.935924	0.538875	-0.328048	-1.05996	-0.413979
MeOH	cold	3	3	2	-0.610744	-1.18768	-2.38682		0.284622	-1.33283	-0.881399	-0.670049	-1.07739	-1.19545
MeOH	cold	3	5	4	0.336108	0.049872	0.10728		-0.227798	0.383739	-0.588455	0.171407	-0.0712501	0.297915
MeOH	cold	4	5	1	0.933971	1.28609	0.47507	0.134164	1.00686	0.236894	0.976488	2.00402	1.20909	1.52492
MeOH	cold	4	1	2	-1.37969	-0.419704	-1.77154		-2.95031	-0.616913	-0.485211	-1.97643	-0.814215	-0.697894
MeOH	cold	5	2	6	-0.308395	-0.209692	3.806	0.50557	0.881126	0.278245	-0.320792	0.470594	0.274659	0.234012
MeOH	cold	5	5	8	1.1911	1.54278	0.317478	-0.367487	1.10265	1.34963	0.853046	1.41199	1.41238	1.01423
MeOH	hot	1	4	2	-1.28923	-1.29358	0.336637		-0.494799	-1.86927	-7.19156	-1.82806	-1.40274	-2.36612
MeOH	hot	1	4	3	0.786068	-0.0887204	-0.372516	0	0.594852	0.852093	-4.48456	1.07444	0.940591	1.363
MeOH	hot	2	4	4	3.07758	3.11087	4.28068	3.63785	4.25419	3.77186	3.51608	3.55965	3.72835	4.19477
MeOH	hot	2	2	6	-0.00467967	-0.746049	-2.89085	0.881	1.06232	-0.602529	-1.34766	-0.544465	-0.816279	-0.118895
MeOH	hot	3	2	7	1.47938	1.00494	4.66649	2.71	2.72899	1.36035	2.51248	1.86137	2.23002	1.31596
MeOH	hot	3	3	9	0.171366	0.933399	0.225215	-0.467096	-1.85633	0.985096	0.597514	1.18056	0.65434	0.282692
MeOH	hot	4	3	1	0.499871	1.00818	2.50528		1.07091	0.664074	-4.37489	0.938217	0.407164	1.18188
MeOH	hot	4	4	8	-2.59406	-1.87295	-3.23629	-2.92696	-1.64846	-3.00273	-1.38124	-3.00381	-3.10542	-2.13561
MeOH	hot	5	1	3	-0.489029	0.0418894	-0.828719	-0.597501	0.360452	-0.375288	32.9565	-0.781989	0.161688	-0.550567
MeOH	hot	5	3	6	-2.12958	-2.43021	-3.04524	-3.83224	-4.54071	-2.51205	-3.89717	-3.0533	-2.69101	-3.53892
Bif	cold	1	1	2	-0.219483	0.334729	-0.736338	-1.27249	-0.614276	-0.711886	0.20092	-0.225167	-0.0235208	-0.618655
Bif	cold	1	3	2	-0.862324	-0.895497	-0.0411203		-0.0296235	-0.154104	0.0125088	-1.86407		-1.19053
Bif	cold	2	3	3	0.331038	0.614652	2.68498	1.41883	0.874995	0.14432	-0.388089	0.842864	0.230268	0.78925
Bif	cold	3	5	4	0.0441472	-0.731489	-1.77402	-0.382099	-2.08019	-1.18914	-0.100667	-0.0515753	-1.425	-0.0913917
Bif	cold	3	3	7	-0.821577	-0.45892	0.160923	0.109287	0.360779	0.692616	1.23865	-0.0609743	-0.763503	0.29083
Bif	cold	3	3	8	-1.10274	-0.00330376	-0.458593	-1.00317	-0.0302682	1.05217	-0.325972	-0.501457	0.246387	-0.0179809
Bif	cold	4	1	3	-0.626945	-1.1678	1.7818	-0.0571064	0.159205	-0.0842036	-1.02338	-0.660499	-0.634029	-0.834852
Bif	cold	4	4	6	-0.282783	0.013999	-1.59444	-0.614414	0.321472	-0.00269167	-0.853697	0.17711	0.0661116	-0.453126
Bif	cold	5	1	1	1.17832	1.66564	0.0617069	0.687201	1.05109	1.395	0.758151	0.841264	1.42953	1.3466
Bif	cold	5	2	5	0.155243	0.179763	-1.97701	-0.39434	0.638804	0.600016	0.540552	1.11718	0.422755	0.599582
Bif	hot	1	2	5	0.363745	-1.02971	-0.872628	-0.0341562	2.3244		0.209957	1.36053	0.725722	1.36463
Bif	hot	1	3	9	-1.56141	-1.1789	0.679453	0.401439	-3.45753	-2.3201	-1.05977	-2.7265	-1.72754	-2.59573
Bif	hot	2	5	1	-0.405178	1.54328	1.12088	-0.280153	-0.804083	0	0.236852	1.24872	0.750114	0.986286
Bif	hot	2	3	2	-0.015646	0.451856	0.529381	-0.654934	1.25513			0.075018	-0.810033	-0.00768079
Bif	hot	2	2	8	0.607236	2.17729	2.25379	0.102087	3.652	1.22896	-2.22645	2.48152	1.56941	2.7625
Bif	hot	3	2	1	1.01607	1.06865	2.38764	2.13308	1.22845	1.72601	0.879196	0.148347	0.532882	0.421575
Bif	hot	3	1	4	-1.27189	-1.84514	-1.22932	-1.16383	-3.70075	-0.790081	-1.86488	-2.50457	-0.138724	-2.35083
Bif	hot	4	3	9	-27.0952	-29.3573	-29.2111	-31.8203	-27.7522	-28.0279	-32.4559	-27.8865	-28.0842	-24.7903
Bif	hot	5	1	6	0.438711	1.25049	-1.38687	-1.09911	-0.18987	-0.232656	-0.530225	-1.10281	-0.492265	-1.15608
Bif	hot	5	3	7	-2.04236	-3.18089	-3.23822	-1.66036	-0.766643	-1.72201	-0.351335	-5.02628	-3.25445	-1.39119
EE2	cold	1	1	3	-0.576407	-1.27063	-2.49243	-1.1	-3.06875	-0.530471	-0.734561	-1.91266	-0.967258	-2.0308
EE2	cold	1	1	6	-1.08383	-1.28874	-0.167764	0.767441	-1.28337	-1.04235	-0.543826	-1.04594	-1.2113	-1.5477
EE2	cold	2	3	2	1.79462	1.60977	2.2623	0.977575	0.179214	2.63045	0.120632	1.44332	0.72244	1.37169
EE2	cold	2	1	7	-1.57308	-1.01472	1.51033	-0.361581	-1.70318	-1.27209	-1.56388	-1.15737	-1.47803	-1.1674
EE2	cold	3	5	4	1.51456	0.378609	1.80201	1.72076	1.50649	-3.78405	0.698414	1.50759	1.68226	1.56122
EE2	cold	4	3	4	-0.525674	-0.269519	0.320222	-0.0900422	0.731064	-0.0580195	-0.143463	-0.652926	-0.986438	-0.72183
EE2	cold	4	1	5	-1.12097	-1.03478	-3.62427	-2.31725	-1.53285	-1.38755	-1.01231	-1.31422	-1.46744	-1.40203
EE2	cold	4	4	9	-1.28689	-0.974208	-1.85486	-1.89767	-0.484661	-1.52095	-1.22658	-0.901872	-0.514243	-1.21577
EE2	cold	5	1	4	2.44568	1.01559	-0.114402	1.01551	2.76123	2.74189	2.60797	1.32037	1.63974	1.81906
EE2	cold	5	2	8	1.68513	2.01076	3.77589	2.65938	1.23597	2.24415	0.762135	1.09501	1.82217	1.98892
EE2	hot	1	5	8	-0.227705	-0.371685	-2.14665	-0.847564	0.0896261	-0.312404	-5.79387	-0.502587	-0.828408	-0.868823
EE2	hot	2	2	1	-29.0719	-30.9333	-31.6201	-34.9261	-28.5608	-27.6217	-33.7535	-30.3112	-31.7554	-26.2573
EE2	hot	2	1	9	-0.146153	0.188297	0.797475	0.592339	0.403999	0.238842	-6.11972	0.634392	-0.0658976	0.441764
EE2	hot	3	2	5	-30.8706	-32.4487	-31.013	-32.7571	-32.4477	-30.6849	-36.1707	-32.4818	-33.9364	-30.0536
EE2	hot	3	1	8	0.866176	0.515621	-0.291503	0.852727	-2.02504	0.801955	-4.99188	0.465579	0.787604	0.798858
EE2	hot	4	5	6	-30.3778	-31.229	-34.0159	-37.0814	-31.8481	-31.2982	-35.9075	-32.4016	-31.8257	-29.0196
EE2	hot	4	1	7	-29.5751	-30.7186	-31.8051	-35.2096	-33.7046	-28.9196	-33.8424	-31.3722	-30.8104	-27.3164
EE2	hot	5	2	1	-30.7479	-32.5256	-34.3906	-36.4878	-32.1664	-32.8016	-35.8724	-33.1418	-32.9394	-27.428
EE2	hot	5	5	3	-0.316478	-1.49896	-0.307317	-0.877133	0.792708	0.0206031	0.400953	-2.70931	0.581415	0.330214
EE2	hot	5	2	5	0.279933	-0.905311	1.98562	0.61457	-2.57547	-1.32825	-0.13231	13.3253	-0.334456	-0.903711

## Sheet: F1 ovaries
Treatment	Temp	Rep	Sample	Sex	Plate	HSD17	HSD3	Arx	CYP19a	ESR1	ESR2	ESR3	FSHR	HSP90	INHA
Bif	Cold	1	1	F	1	-1.12252	-1.7514	-0.883906	-2.15	-2.13614	-0.611571	-1.26	-0.877662	-0.236582	-0.134165
Bif	Cold	1	2	F	3	-165.21	-0.0238951	-0.281236	-5.18888	-0.0185201	-0.538729	-0.0351198	-0.0100109	-0.0851408	-0.257717
Bif	Cold	2	1	F	1	-4.40806	-0.730169	-0.218577	-0.990921	-0.594963	-0.0891529	-0.353703	-0.138376	-0.335011	-0.0108189
Bif	Cold	2	2	F	3	-24.7666	-4.26789	-31.444	-12.3512	-3.74037	-17.1581	-19.695	-0.483611	-0.0355526
Bif	Cold	3	3	F	15	-9.02331		-11.551	-11.585	-0.257564	-4.92485	-3.16594	-2.62232	-1.08408	-1.70385
Bif	Cold	3	5	F	9	-0.101048	-0.0267971	-1.90733	-0.0520729	-0.653211	-0.924253	-0.613305	-0.14331	-1.11726	-0.394194
Bif	Cold	4	5	F	7	-1.44164	-0.0478605	-0.27058	-0.283783	-0.166801	-0.109027	-0.0754736	-395.926	-0.0711166	-0.175764
Bif	Cold	4	6	F	5	-2.31591	-0.362	-0.574966	-1.54512	-0.394093	-0.400134	-0.0694982	-0.0473269	-0.0946668	-0.415316
Bif	Cold	5	1	F	6	-0.0154942	-0.8888	-1.95735	-0.821325	-1.1838	-1.22857	-0.317273	-1.73486	-0.926846	-1.98989
Bif	Cold	5	4	F	4	-0.716077	-0.101334	-0.472461	-0.764273	-0.385355	-0.198187		-0.0725585	-0.0400923	-0.0847691
Bif	Hot	1	2	F	5	-10.6278	-0.492095	-2.2719	-0.774648	-0.408717	-0.884035	-0.0895455	-74.964	-0.193867	-0.658503
Bif	Hot	1	3	F	7	-2.93905	-0.45127	-0.907725	-0.546468	-0.785296	-0.327239	-0.0920606	-0.112116	-0.209596	-1.02747
Bif	Hot	2	4	F	3	-6.71784	-0.156189	-1.22783	-2.2388	-1.56542	-0.977235	-0.0897044		-0.121587	-0.238848
Bif	Hot	2	5	F	9	-1.51689	-0.404462	-1.14462	-2.48799	-0.000242735	-0.460175	-0.299112	-0.167195	-0.184261	-0.463388
Bif	Hot	3	3	F	6	-1.07195	-0.109359	-0.511479	-0.800416	-1.08304	-0.59784	-0.584626	-0.421121	-0.265273	-0.716317
Bif	Hot	4	2	F	8	-1.365	-0.285311	-0.593957	-1.46035	-1.50947	-0.721437	-0.526439	-0.411976	-0.378503	-6.21689
Bif	Hot	4	4	F	6	-0.723363	-0.460281	-0.416618	-0.531613	-0.211082	-1.34793	-0.372726	-6.77475	-0.438878	-0.359671
Bif	Hot	5	4	F	5	-0.394319	-7.49e-06	-1.25754	-3.00311	-1.91419	-0.592125	-0.182334		-0.100266	-0.811561
EE2	Cold	1	1	F	13	-0.858261		-1.06964	-0.749063	-0.374007	-1.12394	-2.26948	-2.74154	-0.0885467	-1.45997
EE2	Cold	1	2	F	4	-1.09375	-0.190482	-4.534	-1.62635	-0.213003	-0.84774	-0.167	0	-0.246634	-0.0390704
EE2	Cold	1	4	F	1	-2.15971	-3.53782	-0.720866	-3.03697	-0.327091	-0.0272593	-0.733136	-1.63026	-0.159345	-0.104366
EE2	Cold	2	2	F	11	-9.98466	-0.21649	-6.61136	-6.85988	-0.680353	-4.14825	-2.57915	-1.45917	-0.378142	-1.07106
EE2	Cold	2	3	F	10	-16.4214	-0.99558	-8.36777	-4.32953	-1.98479	-3.76794	-2.07075	-4.55279	-0.348769	-4.4745
EE2	Cold	2	4	F	9	-0.00488974		-0.0941858	-0.000115424	-0.0725441	-0.111514	-0.0582906	-0.00927675	-0.059817	-0.0144633
EE2	Cold	3	4	F	13	-0.215713	-0.226225	-1.34383	-2.43526	-7.41361	-2.20793	-3.89471	-2.94481	-5.95003	-5.50128
EE2	Cold	3	1	F	15	-333.313	-32.8948	-21.8093	-65.7444	-0.0366985	-35.7341	-10.4316	-29.1304	-27.9074	-36.6722
EE2	Cold	3	5	F	2	-2.45348	-0.160115	-0.334566	-3.46465	-0.473471	-0.338815	-0.18404	-0.451661	-0.418712	-0.475591
EE2	Cold	4	5	F	8	-0.541894	-0.631907	-1.6536	-5.18192	-1.97027	-1.60896	-0.176963	-0.178973	-0.639739	-1.44731
EE2	Cold	4	1	F	9	-1.84571	-0.105505	-0.821157	-3.18386	-1.2912	-0.23193	-0.343692	-0.0994	-0.132047	-0.580006
EE2	Cold	5	3	F	13	-8.44551	-3.2183	-1.5869	-5.48372	-0.728	-2.57803	-1.88945	-1.30466		-1.07441
EE2	Cold	5	3	F		-6.66493		-3.9144	-4.4002	-0.18766	-1.61836	-0.985136	-1.31592
EE2	Hot	1	1	F	7	-11.4983	-0.428251	-1.07051	-5.09551	-1.0937	-2.70116	-0.67354	-0.636579	-0.255015	-1.71391
EE2	Hot	1	2	F	3	-0.114872	-0.0883437	-0.583602	-0.0520046	-0.00384152	-0.0370796	-0.0225218	-7.29e-07	-0.0498228	-0.171562
EE2	Hot	1	4	F	15	-14.1081	-1.61606	-8.09416	-13.7189	-2.75e-06	-0.59904	-1.104	-2.19762	-0.505636	-0.0251745
EE2	Hot	2	2	F	5	-6.0908	-1.7941	-10.665	-2.34145	-2.15359	-0.805072	-0.355927	-0.0199869	-0.205555	-0.974648
EE2	Hot	2	6	F	8	-0.176725	-0.00433811	-0.243013	-0.399698	-0.163828	-0.619691	-0.643946	-0.624731	-2.08356	-0.609994
EE2	Hot	4	2	F	8	-37.2579	-1.34833	-2.80695	-5.30327	-1.82785	-4.99165	-0.471363		-2.0979	-0.963772
EE2	Hot	4	3	F	13	-30.523	-4.27134	-7.9887	-18.6265	-2.64213	-5.92786	-2.89414	-5.8682	-1.99683	-3.73423
EE2	Hot	5	4	F	3	-0.0721082	-0.0625341	-0.671658	-0.270175	-2.17685	-0.971941	-0.228277		-0.523506	-0.374441
EE2	Hot	5	2	F	10	-28.0515	-0.490658	-1.18628	-1.15535	-1.03014	-0.491956	-0.20465	-0.445649	-0.565268	-2.07134
EE2	Hot	5	6	F	11	-19.5707		-11.7196	-11.6212	-10.8816	-2.89825	-0.761096	-1.59034	-0.0245248	-1.86166
MeOH	Cold	1	1	F	5	-0.153614	-0.0135836	-0.406007	-0.844004	-0.342674	-0.703962	-0.956194	-0.000568226	-0.624204	-2.18871
MeOH	Cold	2	3	F		-4.38103	-1.17156	-0.548407	-4.16026	-0.436845	-1.0447	-1.03375	-1.46436	-0.21627	-1.22368
MeOH	Cold	2	1	F		-1.85554	-6.71e-05	-4.44545	-5.33353	-0.915049	-0.546646		-1.02375	-0.0905093
MeOH	Cold	3	5	F	13	-4.70885	-1.03408	-1.22902	-7.31783	-2.38318	-1.91324	-1.09827	-1.47422		-2.55565
MeOH	Cold	3	3	F	2	-39.2414	-4.13091	-5.34451	-27.1612	-9.25604	-6.63852	-3.73413	-4.26634		-3.54108
MeOH	Cold	3	6	F	1	-4.03007	-0.929419	-0.617897	-4.62259	-0.115174	-0.11862	-1.20362	-0.566543	-0.19888	-0.0547527
MeOH	Cold	4	4	F		-5.86604		-2.50801	-6.40184	-3.10751	-2.44604	-0.9787	-1.67672	-1.16784	-1.35111
MeOH	Cold	4	3	F		-0.733921	-0.248491	-0.0733598	-1.1373	-0.137834	-0.062195	-0.0315683	-0.123336	-0.0456113	-0.265023
MeOH	Cold	4	1	F	16	-4.27124	-0.34889	-1.3788	-10.6965		-2.21606	-2.91988	-0.644135	-0.67757	-0.91156
MeOH	Cold	5	5	F	11	-4.8538	-0.213429	-0.803494	-0.786417		-0.382136	-0.00106535	-0.156387	-0.305584	-0.444265
MeOH	Cold	5	6	F	10	-0.0192742	-0.144428	-0.248107	-1.17905	-0.251598	-0.2482	-0.136822	-0.216694	-0.0254098	-0.41566
MeOH	Hot	1	5	F	10	-9.14203	-1.14105	-1.37832	-3.13809	-0.977131	-0.649231	-0.48	-1.18768	-0.391067	-1.2612
MeOH	Hot	2	2	F	15	-7.56376	-1.42108	-2.08784	-1.13558	-0.0831702	-0.514438	-0.678123	-1.25536		-0.00908992
MeOH	Hot	2	3	F	6	-12.6681	-0.0996502	-0.496545	-3.71049	-0.389035	-1.43098	-0.336657	-1.43637	-0.492583	-0.740857
MeOH	Hot	2	6	F	4	-1.07379	-0.206346	-2.08105	-1.0597	-0.377296	-0.199133	-0.0943742	-0.150195	-0.108641	-0.0997704
MeOH	Hot	4	5	F	16	-1.6686		-0.127671	-0.396089		-0.259562	-5.66e-05	-0.142001	-0.300108	-0.0231254
MeOH	Hot	5	3	F	11	-0.0343645	-0.000408	-0.627374	-0.413874	-0.450608	-0.238421	-0.142689	-0.22915	-0.181795
MeOH	Hot	5	6	F		-22.947	-1.09379	-1.62347	-0.000294998	-22.1272	-2.40361	-0.399108	-0.244004	-0.544863	-0.358963
MeOH	Hot	4		F		-7.37804	-0.570271	-0.424582	-2.08907	-1.53963	-0.808058	-0.458914	-2.80622	-0.163714	-0.44094

## Sheet: F1 testes
Treatment	Temp	Rep	Sample	Sex	Plate	HSD17	HSD3	Arx	CYP19a	ESR1	ESR2	ESR3	FSHR	HSP90	INHA
Bif	Cold	1	4	M	9	-14.953	-0.293551	-1.77479	-3.42157	-0.759012	-0.87754	-0.410604	-0.431982	-0.511155	-0.737007
Bif	Cold	2	2	M	15	-0.0302737	-0.0390452	-0.130942	-0.0336584	-0.0464892	-1.30877	-0.359346	-0.195653	-0.481022	-0.0200096
Bif	Cold	3	4	M	7	-0.260579	-0.199214	-1.39553	-0.00974306	-1.43129	-4.15612	-0.658126	-0.412994	-1.20111	-0.251665
Bif	Cold	3	6	M	8	-0.123026	-0.0528754	-1.28928	-0.0151393	-0.195151	-0.880919	-0.616629	-0.900481	-0.899074	-0.284072
Bif	Cold	4	3	M	10	-0.0135498	-0.0146323	-0.165289	-0.0358823	-0.13465	-0.36263	-0.0890673	-0.226029	-0.472219	-0.0709928
Bif	Cold	5	5	M	11	-15.6675		-1.78427	-1.94041	-1.50569	-0.823413	-0.385799		-0.0993108	-0.387435
Bif	Hot	1		M		-0.0166384	-0.0357154	-0.0827041	-0.108149	-0.138227	-0.438188	-0.184071	-0.122924	-0.245414	-0.286473
Bif	Hot	1	5	M		-12.9589	-0.662357	-0.887136	-1.62158	-0.26085	-0.571414	-1.09371	-0.0708	-0.0228348	-100.801
Bif	Hot	2	1	M	11	-0.306163		-0.548693	-1.48534	-1.20905	-0.498573		-0.128207	-0.1177	-0.183637
Bif	Hot	3	2	M	3	-0.0643561	-0.0388764	-2.75668	-0.084112	-6.3396	-0.240811	-0.0514044	-1.86e-05		-0.234097
Bif	Hot	4	5	M	2	-0.453584	-0.0950124	-0.733882	-0.897521	-9.40722	-0.917057	-0.514071	-0.879906	-2.23475	-1.80123
Bif	Hot	5	3	M	5	-0.0679497	-0.1466	-2.39887	-0.39	-0.690129	-2.49296	-0.789878	-0.654817	-1.71698	-0.561835
Bif	Hot	5	2	M		-0.0262961	-0.0435467	-0.159077	-0.124464	-2.65102	-0.436664	-0.271343	-0.0572386	-0.504428	-0.60018
EE2	Cold	1	3	M	10	-0.0340722	-0.137688	-0.520594	-0.78787	-2.59223		-0.759466	-1.53421	-0.67461	-1.20375
EE2	Cold	1	5	M	5	-0.11843	-0.0434988	-5.5044	-0.188087	-1.96747	-2.97063	-2.76675	-1.94709	-2.90654	-0.411144
EE2	Cold	2	6	M		-0.0628738	-3.56694	-3.67144	-0.825118	-1.73572	-3.02864	-1.55283	-1.9851		-3.06549
EE2	Cold	3	2	M	15	-0.165754	-0.508071	-1.38068	-1.30365	-28.4683	-2.47518	-3.03295	-0.842141	-1.90752	-0.026597
EE2	Cold	3	3	M	1	-4.34855	-1.05811	-0.240441	-1.81636	-0.607471	-0.116859	-0.352172	-0.24834	-0.265	-0.0354095
EE2	Cold	3	4	M	6	-8.35396	-0.634821	-2.68939	-3.67708	-1.09771	-1.92172	-0.470165	-0.311175	-0.414234	-0.505253
EE2	Cold	4	3	M	1	-0.0210597	-1.66782	-0.145714	-3.66327	-0.09318	-0.125802	-1.09357	-0.454255	-0.305947	-0.0724511
EE2	Cold	5	4	M	7	-0.754358	-0.00415117	-0.285616	-2.0124	-0.305089	-0.307471	-0.225392	-0.1704	-0.0462204	-0.586755
EE2	Cold	5	5	M	8	-0.454326	-0.119369	-2.77277	-0.222088	-0.703427	-2.79305	-1.19519	-3.10271	-1.11055	-0.265925
EE2	Hot	1	3	M	2	-1.08619	-0.0230713	-0.986558	-0.028613	-0.602537	-2.04192	-0.840272	-0.664094	-1.05376	-0.136738
EE2	Hot	2	3	M		-0.00258235	-0.00870991	-0.0153941	-0.128261	-0.516046	-1.30271	-0.39391	-0.0100495	-0.152095	-0.0562241
EE2	Hot	2	4	M	6	-4.20565	-0.273543	-0.151235	-0.46066	-0.348033	-0.136617	-0.0869638	-0.221411	-0.0531264	-0.337246
EE2	Hot	2	5	M	7	-0.35329	-0.134232	-0.225649		-0.294548	-0.309228	-0.103467	-0.298229	-0.214593	-0.593459
EE2	Hot	5	1	M	9	-0.00194623		-1.54207	-0.731559	-0.412753	-0.419085	-0.0994635	-0.00101118	-0.417344	-1.05058
EE2	Hot	5	5	M	2	-0.323523	-2.54175	-2.70482	-12.8946	-19.2797	-4.77171	-8.98934	-5.21389	-6.25563	-11.6133
MeOH	Cold	1	5	M		-0.786633	-0.310977	-3.70582	-0.264182	-1.01369	-8.86246	-1.68375	-2.30962	-0.718473	-3.47692
MeOH	Cold	2	5	M		-0.00403238	-0.0018969	-0.0120445	-0.00649956	-0.00402326	-0.010642	-0.00870503	-0.00889512	-0.510857
MeOH	Cold	2	6	M	16	-1.41757	-2.54052	-3.89857	-15.2509	-4.48184	-3.05985	-1.6345	-0.949439	-0.461017	-2.02891
MeOH	Cold	3	1	M		-0.603829	-0.108292	-0.313496	-0.0587751	-0.637329	-1.88226	-2.20344	-1.13955	-2.65353	-0.514396
MeOH	Cold	5	4	M		-0.48582	-4.05458	-2.53817	-0.142904	-1.39	-4.27115	-3.2035	-3.24537	-3.36648	-3.53512
MeOH	Cold	4		M		-0.576875	-0.107909	-0.335464	-0.429738	-0.683616	-0.476682	-0.296355	-0.759409	-0.226195	-0.221601
MeOH	Hot	1	1	M	16	-0.147412	-0.0197492	-0.59963	-0.00983768		-2.25961	-0.712001	-0.269072		-0.00318709
MeOH	Hot	1	4	M	3	-4.60413	-1.23248	-4.65644	-0.269	-0.0253501	-1.76362		-0.012131	-1.55891	-0.982555
MeOH	Hot	2	4	M	9	-0.000989348	-0.239123	-1.1175	-0.0724387	-0.492417	-1.53909	-0.856492	-0.551699	-2.45018	-0.168287
MeOH	Hot	2	5	M	1	-0.0167559	-0.0732939	-0.090355	-0.00514427	-0.192397	-0.0527763	-0.143616	-0.244501	-0.0591957	-0.0067261
MeOH	Hot	4	4	M	7	-3.02891	-0.615345	-0.541307	-2.20705	-0.134429	-1.41213	-0.309505	-0.460666	-0.11861	-0.836509
MeOH	Hot	4	6	M	4	-0.145121	-0.032577	-0.302082	-0.505239	-0.257012	-0.285037		-0.0720157	-0.0415706	-0.0811245
MeOH	Hot	1	3	M	13	-0.426761	-0.175777	-0.676807	-0.288265	-0.619564	-2.35855	-1.10237	-0.59307		-1.12815
MeOH	Hot	5	1	M	2	-0.131656	-0.523563	-0.802864	-1.70024	-0.746245	-1.27827	-1.97377	-0.799192	-1.1703	-4.67686

## Sheet: F2 larvae
Treatment	Temp	Rep	Fish	Plate	HSD17	HSD3	CYP19b	ESR1	ESR2	ESR3	FSHR	GnRHR	GPR30	IGF2
MeOH	cold	1	5	3	-0.219418	-0.857775	-1.30732	-0.00694498	-0.902504	-0.65476	-7.36699	-0.307015	-0.332923	0.0472447
MeOH	cold	1	1	5	-0.892335	-0.0548882	0.659524	-0.0158541	-0.288762	0.499449	-5.17955	-0.296501	0.60294	0.618137
MeOH	cold	2	4	4	-0.380933	0.825856	1.15129	0.0438826	-0.482963	0.344512	-7.01647	0.57721	-2.21117	0.332727
MeOH	cold	2	2	5	0.941285	0.81295	0.346479	0.0401739	-0.0782281	1.06918	-6.90966	1.17691	0.739919	0.826562
MeOH	cold	2	5	8	2.1027	-2.27222	3.38498	3.30122	4.95568	2.65359	3.8761	3.55519	-1.57172	3.6419
MeOH	cold	5	4	7	3.46182	-0.70095	2.91091	3.42505	4.09167	3.4939	3.28904	3.06517	-3.57234	2.79899
MeOH	cold	4	5	1	0.0473257	0.0619378	-0.875316	-0.0484333	-0.557999	-0.685965	-5.73387	-1.65913	0.350563	-1.28244
MeOH	cold	4	1	7	-0.624226	-5.07042	-0.2063	-0.116569	-1.01572	-1.74809	-0.616579	-0.320411	-3.39055	-0.730398
MeOH	cold	5	5	5	0.504075	-0.788081	0.0253396	-0.0128241	2.31046	-0.572417		0.508525	0.850675	-0.542234
MeOH	cold	5	2	6	-3.83484	-8.74195	-4.56907	-3.46971	-5.25882	-4.03252	-2.84289	-4.26003	-9.0087	-3.94874
MeOH	hot	1	3	7	0.83718	0.894563	0.202729	0.80533	1.17021	-0.481257	0.558611	1.49141	0.235819	0.62238
MeOH	hot	2	2	8	-2.884	-0.410359	-0.475863	-0.68945	0.24287	-0.334561	-0.707836	-0.910634	1.63692	0.0581299
MeOH	hot	4	5	3	0.096969	1.60295	-0.334159	-1.31163	-2.17297	-0.0364221	-0.113263	0.291283	2.65609	-0.945504
MeOH	hot	4	3	4	0.985954	-0.158849	1.07579	1.60506	1.25346	0.702762	-1.03943	0.839197	0.0668927	0.976902
MeOH	hot	5	1	6	0.695878	0.177017	0.980002	0.819458	0.509501	0.881424	-0.900358	-0.738893	-2.67773	-0.593267
MeOH	hot	5	2	7	-0.337491	-1.0299	-0.73669	-0.913406	-1.3501	-0.560193	1.47383	-1.31353	-1.77083	-0.63478
Bif	cold	2	5	1	-0.0565086	-4.28072	1.00585	-1.13831	1.8272	1.02631	-3.45917	-0.0109914	-3.65096	0.195286
Bif	cold	2	4	5	2.5104	2.08846	2.91875	1.62653	2.73667	2.58441	2.18665	2.97411	-11.9384	3.03013
Bif	cold	3	1	3	0.833579		0.0259499	0.079731	-0.816875	0.540668	1.4466	0.648981	-6.33542	0.989939
Bif	cold	3	3	6	2.20309	3.12173	1.39141	3.07376	2.69766	2.36202	1.30502	2.33408	-5.91686	1.99684
Bif	cold	4	1	3	-1.88253	-7.14278	-2.55233	-2.08141	-3.78313	-1.93386	-1.6931	-2.67791		-2.94697
Bif	cold	4	2	4	0.560709	-0.118766	-0.325715	-0.225002	-0.76489	0.0997222	0.029485	-0.807053	-11.5625	-0.336401
Bif	cold	4	1	1	2.38438	1.89369	2.61222	2.21358	3.1053	0.596767	2.55982	2.47218		2.35781
Bif	cold	4	5	4	-1.73435	-1.90641	-2.07593	-2.4205	-2.93739	-2.14265	-2.13111	-2.50557	-10.0707	-2.3318
Bif	cold	5	1	8	-3.63795	-2.08163	-0.626407	-2.00136	-1.29494	-2.51657	-2.61971	-2.0802	-9.39413	-2.3138
Bif	hot	1	3	7	-4.03852	-0.393995	0.234744	-2.05732	-0.398353	0.322702	-3.05166	-1.07912	-0.142246	-0.837663
Bif	hot	1	4	8	-3.33457	1.1799	0.323827	1.59529	0.614523	1.83003	-0.319462	0.595096	0.263648	1.13748
Bif	hot	2	1	3	-4.12216	0.21114	-0.242776	-0.052098	0.268658	0.39891	0.533986	0.353229	0.283258	0.755172
Bif	hot	4	3	7		-0.911176	-1.53389	-0.823988	-0.84108	-2.26034	-1.02555	-1.63351	-1.5433	-1.29507
Bif	hot	5	2	6	-6.88705	-0.302538	0.432077	0.1436	-1.48456	-0.741555	1.28832	-0.352147	0.21246	-0.489572
Bif	hot	5	4	6	-2.92172	0.0911882	0.884195	0.84482	1.21064	1.23528	0.837822	1.24031	1.00398	1.05696
EE2	cold	1	4	6	-2.85226	-0.754752	-0.632004	-0.719507	-0.744371	-1.01375	-0.822139	-1.47393	-8.4066	-1.54219
EE2	cold	2	2	4	1.73368	1.45124	1.542	1.95237	2.32093	1.96877	1.42114	2.87648	-8.52946	2.45433
EE2	cold	2	3	5	-0.740235	-0.298868	-0.680229	-2.60726	-1.18448	-0.121511	-0.875178	-1.74758		-3.21432
EE2	cold	3	5	4	-0.097416	-0.843138	-1.45527	-0.93612	-1.02338	-1.23825	-2.61821	-1.49345	-11.6332	-0.53088
EE2	cold	3	5	7	0.478033	-0.0462348	0.29007	-0.416967	-0.331317	-1.62429	0.680608	0.0956821	-12.9434	0.4299
EE2	cold	4	4	5	0.881018	0.782181	0.937823	1.69803	0.0337785	1.62136	2.5607	1.07816	-9.42968	1.46815
EE2	cold	4	5	8	0.605515	-1.07541	-0.711805	-0.315365	0.347028	-0.171753	0.728444	0.341166	-0.147169	0.516139
EE2	cold	5	5	3	-2.28629	-2.99706	-3.89433	-2.26701	-3.54241	-0.983705	-1.33017	-2.38755		-2.40277
EE2	cold	5	3	4	0.597187	-0.290433	-0.00239246	1.02946	0.928841	0.40766	-0.346928	0.664635		0.93502
EE2	hot	1	3	1	-6.63287	0.12548	-0.0981771	0.349694	0.630172	-0.785025	1.73654	0.876137	-0.0778024	-0.327311
EE2	hot	1	5	1	0.27917	-0.474351	-0.591034	0.425609	0.683137	0.143143		0.849544	-0.799697	1.60905
EE2	hot	2	1	1	-0.0997198	-1.73787	-0.455116	-0.265599	1.40222	-0.220496		-0.00357349	-0.130166	0.146804
EE2	hot	2	3	3	-1.43153	0.123999	-0.812999	-0.802695	-3.64942	-1.54554	-16.8008	-0.523144	0.537627	-0.616927
EE2	hot	5	5	5	0.543187	0.73822	0.469062	0.305847	0.269579	0.447446	-14.3276	-0.445902	-0.947485	-3.33767
EE2	hot	5	2	6	0.708892	1.35	1.39009	0.336837	1.29448	1.17545	-13.3639	0.123075	1.33972	2.19874

## Sheet: Description 
The data provided are calculated fold change data
Normalization factors (GeNORM) were calculated for each sample using the geometric means of 2 reference genes (RPL_7 and EF1a) used in this study according to methods in Vandesompele et al. (2002).
Raw CT values were normalized using the GeNORM across all genes of interest in each individual sample (Vandesompele et al., 2002).
Data from all treatments, including controls, were processed using the same methods to allow us to directly compare responses in a fully crossed study design. Thus, values in EDC treatment groups were not normalized by expression within the control groups, but by the GeNORM (geometric mean of the 2 reference genes) for each sample, as conducted in Goff et al. (2017).
Normalized CT values were then converted to log(2) fold change data using 2^-delta delta CT as described in Livak and Schmittgen (2001).
We tested for differences in expression between treatments using the provided code in R (v 3.4.3).
